# Supplementary material for: Ubiquitin binds the amyloid β peptide and interferes with its clearance pathways
Source: PubMed Central journal article supplement — Chem Sci. 2019 Jan 10;10(9):2732–42. doi: 10.1039/c8sc03394c (PMC6419943; doi:10.1039/c8sc03394c), 2019-01-10
Supplement: SC-010-C8SC03394C-s001.pdf [file SC-010-C8SC03394C-s001.pdf]

## Ubiquitin binds the Amyloid $\beta$ peptide and interferes with its clearance pathways

By

F. Bellia, V. Lanza, S. García-Viñuales, I. M. M. Ahmed, A. Pietropaolo, C. Iacobucci, G. Malgieri, G. D'Abrosca, R. Fattorusso, V. G. Nicoletti, D. Sbardella, G. R. Tundo, M. Coletta, D. Calcagno, L. Pirone, E. Pedone, G. Grasso, D. Milardi.

**Supplementary information.**

## Materials and Methods

*Chemicals.* A $\beta$ 40 (HFIP treated) was purchased from Bachem. A $\beta$ <sub>1-16</sub> was purchased from Genscript. PBS (phosphate buffer saline), Tween 20, ubiquitin, and other chemicals were purchased from Sigma-Aldrich. Carboxy-methyl-dextrane functionalized gold sensor slide (CMD3D) was obtained from Bionavis Company.

*IDE-dependent hydrolysis.* A $\beta$ 40 (Genscript) was properly treated in order to enrich the sample of monomer species according an experimental procedure previously reported.<sup>1</sup> The amyloid peptide (2  $\mu$ M) was then incubated in phosphate buffer (1 mM, pH 7.4) with Ub (1-6  $\mu$ M) IDE (5 nM). Time-course experiments were carried out for 1 or 2 hours. The reaction of each sample aliquots was stopped by adding TFA (1 %).

*LC-MS measurements.* Ultra-High Performance Liquid chromatography (UHPLC) analyses were performed using a Ultimate 3000 (Thermo Electron Corporation, USA), and Q-Exactive hybrid quadrupole-Orbitrap mass spectrometer (Thermo Electron Corporation, USA) was coupled to the LC system for the high resolution detection of the amyloid peptide fragments. Capillary temperature and voltage were 300 °C and 2 kV, respectively. The chromatographic analyses were performed with solvents A (H<sub>2</sub>O:CH<sub>3</sub>CN 5:95, 0.01% TFA) and B (H<sub>2</sub>O:CH<sub>3</sub>CN 20:80, 0.01% TFA) on a Easy Spray Accucore® C4 (75  $\mu$ m  $\times$  150 mm, 2.6- $\mu$ m particle size) column, at a flow rate of 300 nl/min. Peak detection for quantitative evaluation was carried out using the extracted ion chromatogram (XIC) related to the most abundant charged species detected for each peptide fragment. MS and MS–MS (HCD) spectra were used for identification and unambiguous assignment of the peptide fragments (see Table S1).

*MALDI-TOF measurements.* MALDI-TOF MS experiments were performed using an AB SCIEX MALDI-TOF/TOF 5800 Analyzer (AB SCIEX, Foster City, CA) equipped with a nitrogen UV laser ( $\lambda$  = 337 nm) pulsed at a 20 Hz frequency. The mass spectrometer operated in the linear mode was also, which consisted of an accelerating potential of 25 kV, a grid percentage of 93% and an extraction delay of 800 ns. Mass spectra were recorded with the laser intensity set just above the ionization threshold (4500 in arbitrary units) to avoid fragmentation and labile group losses, to maximize the resolution, and to result in a strong analyte signal with minimal matrix interference. Mass spectra were obtained by accumulation 800–1000 laser shots and processed using Data Explorer 4.11 software (Applied Biosystems). A saturated solution of sinapinic acid in water/acetonitrile 70:30 with 0.1% TFA was used as the matrix with the sample concentration ranging from 0.2 to 1  $\mu$ M. Experimental spectra were analysed using Data Explorer software.

*Aβ aggregation assay.* The monomerized Aβ peptide (20 μM) was suspended in phosphate buffer 10 mM (pH 7.4), along with ThT (40 μM) and ubiquitin (from 4 μM to 60 μM); they were then incubated in a black 96-well plate (Nalge-Nunc, Rochester, NY) for 65 hours at 37 °C in the Varioskan plate reader (Thermo Scientific). The kinetics of amyloid aggregation was followed by measuring the ThT fluorescence emission at 480 nm with an excitation wavelength of 450 nm. All the measurements were carried out in triplicate and the experimental data were fitted to equation (1):

$$F(t) = F_0 + mt + \frac{F_{max} - F_0}{1 + e^{-\frac{t - t_{1/2}}{k}}} \quad (1)$$

in which  $F_0$  and  $F_{max}$  are the initial and final fluorescence emissions of amyloid aggregation process, respectively;  $1/k$  is the elongation rate constant and  $t_{1/2}$  is the time at which the amplitude of ThT emission is 50% of the  $F_{max} - F_0$  value. The lag time ( $t_{lag}$ ) is defined as the intercept between the time axis and the tangent of the curve with slope  $k$  from the midpoint of the fitted sigmoidal curve; this parameter was calculated from the fitted parameters by using the following equation:

$$t_{lag} = t_{1/2} - 2k \quad (2)$$

The kinetic parameters of any set of measurements were expressed as mean  $\pm$  SD (Table S2).

*Cross-linking MS.* Cross-linking experiments were conducted in duplicate and the identified cross-links were combined. All chemicals were obtained from Sigma Aldrich (Taufkirchen, Germany). HPLC solvents were purchased from VWR (Darmstadt, Germany), Milli-Q water was produced by a TKA Pacific system with X-CAD dispenser from Thermo Electron LED GmbH (Thermo Fisher Scientific, Niederelbert, Germany). Cross-linking reactions. Ub stock solution was diluted to give a final protein concentration of 10 μM (20 mM HEPES at pH 8.0). 1 uL of a freshly prepared stock solution of Aβ40 in DMSO was added to 49 uL of Ub solution to a final Aβ40 concentrations of 10 μM. The protein solution was incubated for 30 min at 37° C or on ice and 0.5 ul of DSBU in DMSO were added to a final concentration of 1 mM. The final concentration of DMSO was 3%vv. The reaction was incubated for for 30 minutes at 37° C or 1 hour on ice and it was stopped with Tris buffer (final concentration 20 mM).

*Enzymatic in-solution digestion.* Protein solutions were subjected to in-solution digestion with trypsin/GluC mixture according to an existing protocol.<sup>2</sup>

*Nano-HPLC/Nano-ESI-Orbitrap-MS/MS measurements.* Peptide mixtures were analyzed by LC/MS/MS on an UltiMate 3000 RSLC nano-HPLC system (Thermo Fisher Scientific) coupled to an Orbitrap Q-Exactive Plus mass spectrometer (Thermo Fisher Scientific), equipped with Nanospray Flex ion source (Thermo Fisher Scientific). Fragmentation was performed by HCD ( $30 \pm 3\%$  NCE); data were acquired in data-dependent MS/MS mode. Each high-resolution full scan ( $R = 140,000$  at  $m/z$  200) in the Orbitrap was followed by high-resolution HCD product ion scans ( $R = 17,500$  at  $m/z$  200) within 5 s, starting with the most intense signal in the mass spectrum (isolation window of 2 Th). A with maximum accumulation times of 250 ms was employed. Dynamic exclusion (exclusion duration 60s) was enabled.

*Identification of Cross-Linked Products.* Cross-linked products were automatically annotated with MeroX and manually validated. Mass deviations of 3 and 10 ppm were applied for precursor and product ions. A 5% FDR cut-off and a signal-to-noise ratio of  $\geq 2$  were applied. Lys, Ser, Thr, and Tyr were considered as potential cross-linking sites for DSBU. Oxidation of Met and carbamidomethylation of cysteines were set as variable modifications. Three missed cleavage sites were considered for each amino acid [Lys and Arg].

*NMR analysis.* Two samples were prepared for the NMR characterization. 100  $\mu\text{M}$  or 60 $\mu\text{M}$  final concentration of  $^{15}\text{N}$ - $^{13}\text{C}$  labeled human-Ubiquitin (Ub) (CortecNet, Voisins le Bretonneux France) was dissolved in 500  $\mu\text{L}$  of 10 mM phosphate buffer (90%  $\text{H}_2\text{O}$ , 10%  $2\text{H}_2\text{O}$ , pH 7.0). A $\beta$ 40 unlabeled was added to both solutions as a single aliquot of known amount of lyophilized peptide. The final peptide concentration was in both cases 30  $\mu\text{M}$ . Freshly prepared sample were used immediately. NMR experiments were acquired on each sample at 298 K on a Bruker Avance III HD 600 MHz equipped with cryoprobe at the Department of Environmental, Biological and Pharmaceutical Sciences and Technologies of the University of Campania – Luigi Vanvitelli (Caserta, Italy). Chemical shifts were calibrated indirectly by using external references. Data were processed with the TopSpin 3.5 software (Bruker) and analysed by using CARA software (computer aided resonance assignment - cara.nmr.ch). A standard set of triple resonance NMR experiments were collected as previously reported<sup>4</sup> to enable sequence-specific backbone and C $\alpha$  resonances assignment. The pulsed-field gradient spin-echo DOSY experiment was used to measure the translation diffusion coefficient. The intensity variations of the amide cross-peaks were evaluated using the equation:  $\Delta I = (I - I_0)/I_0$ , where  $I_0$  and  $I$  are the amide cross-peak intensities in absence and in presence of A $\beta$ 40 respectively.

*Molecular simulations.* A $\beta$ 40 and A $\beta$ 42 underwent 75 ns of parallel tempering simulations in explicit solvent, after an equilibration of 2 ns of MD in explicit solvent. GROMACS 5.0.4 package was used.<sup>5</sup> Parallel tempering simulations were used in order to boost the sampling of flexible protein domains, avoiding any dependence on the starting coordinates. The overall charge of the system was neutralized by adding three sodium ions. Periodic boundary conditions were applied. The AMBER99SB<sup>6</sup> force field was used for the biomolecules and counter ions, and the TIP3P force field was used for water molecules<sup>7</sup>. Electrostatic interactions were calculated using the Particle Mesh Ewald method.<sup>8</sup> A cutoff (0.9 nm) was used for the Lennard-Jones interactions. The time-step was set to 2 fs. All bond lengths were constrained to their equilibrium values using the SHAKE<sup>9</sup> algorithm for water and the LINCS<sup>10</sup> algorithm for the peptide. We simulated 64 replicas distributed in the temperature range 300-400 K following a geometric progression. All replicas were simulated in NVT ensemble using a stochastic thermostat with a coupling time of 0.1 ps.<sup>11</sup> A thermostat that yields the correct energy fluctuations of the canonical ensemble is crucial in parallel tempering simulations.<sup>12</sup> Exchanges were attempted every 0.1 ps. The method of Daura and Van Gunsteren<sup>13</sup> was used in post-processing phase to cluster the resulting trajectories, with a cutoff of 4 Å calculated on the backbone atoms as implemented in the clustering utility provided in the GROMACS package<sup>5</sup>. The former protocol has been successful in a wealth of studies.<sup>14-19</sup> Docking simulations have been performed using HADDOCK interface.<sup>20</sup> The three main A $\beta$ 40 and A $\beta$ 42 clusters found through PT simulations were docked to the Ub structure whose starting coordinates were considered from the X-ray structure of the complex between the UBA1 enzyme and Ub (pdb code: 3CMM). The following residues of Ub were considered as active residues, since observed through NMR experiments to interact with A $\beta$ 40. Those involve Q2, L8, G10, K11, T12, I23, A46, G47, Q49, K63, L71, R72, L73, R74. The binding surface of A $\beta$ 40 and A $\beta$ 42 was considered as active surface. Structures underwent rigid body energy minimization, semirigid simulated annealing in torsion angle space, with a final clusterization of the results.

*Surface Plasmon Resonance.* To assess the interaction between ubiquitin and A $\beta$ 40 a multi-parametric SPR instrument (Bionavis SPR Navi 210A) was used. Covalent A $\beta$ 40 immobilization was obtained by amine coupling of the lysine-free amino groups and terminal amines of the peptide, as described elsewhere.<sup>21</sup> CMD3D sensor was mounted onto the sensor slide holder and then onto the SPR Navi 210A instrument, previously equilibrated with the running buffer, PBS 10mM (pH 7.4). The flow cell temperature was set to 22C°. Activation of CMD3D sensor was performed immediately previous A $\beta$  injection through the reaction between EDC (0,2M)/NHS (0,05M) and matrix carboxyl groups to achieve reactive succinimide ester groups that can react with primary amines. Lyophilized amyloid beta 1-40 (HFIP treated) was dissolved in pure DMSO to a final

concentration of 1,6mM and stored in freezer at -20 C°. To avoid amyloid beta aggregation the injection solutions were prepared immediately before immobilization step diluting the peptide stock solution in sodium acetate buffer (10mM, pH 4); in particular two amyloid beta injections were performed at 5 µM for 10 minutes at 15 µl/min and two injections at 10 µM was performed for 15 minutes at 15 µl/min. Immobilization was performed in parallel configuration in the channel 1 while in the channel 2 (reference channel) only running buffer was injected. At the end of the immobilization step ethanolamine-HCl 1M (pH 8,5) was injected in serial mode for 10 minutes at 15 µl/min to deactivate all the residual active sites on the surface. After deactivation step the final immobilization angular delta ( $\Delta\theta$ ) was 0,27 degrees. Analysis of the binding curves was carried out by the Tracedrawer software®. Residual values between the fitted curves and the experimental ones are reported in figure S1. Fitting parameters are reported in Table S4.

*Microscale Thermophoresis (MST)*. MST experiments were performed on a Monolith NT 115 system (Nano Temper Technologies, Munchen, Germany) using 100% LED and 20% IR-laser power. The labelling of Ab40 and Ab1-16 (10 µM) was performed in labelling buffer with NT-647-NHS reactive dye (30 µM) (Nanotemper), which reacts efficiently with the primary amines of the proteins to form a stable dye protein conjugates. The labeling reaction was carried out for 30 min at RT. A 16-point serial dilution (1:1) was prepared for ubiquitin at the final concentration ranged from 1 mM to 30 nM in PBS tween 0.05%. The samples were filled into Standard capillaries and measurements were conducted at 25 °C. An equation implemented by the software MO-S002 MO Affinity Analysis, provided by the manufacturer, was used for fitting normalized fluorescence values at different concentrations of ligands.<sup>21</sup>

*Lys63 and Lys48 self-polyubiquitination reactions in Tube Tests*. Lys63-linked polyUb reactions were performed at pH 7.4 (T = 37 °C) in small volumes (40 µL) of a ligation buffer (50 mM TRIS, 5 mM MgCl<sub>2</sub>, 100 µM DTT, and 2 mM ATP) containing Ub (10 µM), UBE1 (500 nM), and UbcH13/Uev (50 nM). Lys48 polyUb chain synthesis was carried out by mixing Ub (10 µM), UBE1 (100 nM), and E2-25K (1 µM) in the same experimental conditions as those used for Lys63 polyUb reactions. All reactions were carried out at different A $\beta$ <sub>1-16</sub> to Ub molar ratios and constant Ub concentration. The reactions were quenched after 3-hour incubation with addition of 10 µL of the sample loading buffer containing 8% (w/v) SDS, 24% (v/v) glycerol, 0.015% Coomassie Blue G, and were size-fractionated by SDS-polyacrylamide gel electrophoresis. Samples were then electro-transferred onto a nitrocellulose membrane (GE Healthcare, Lifescience). The membranes were blocked with Odyssey blocking buffer for 1 hour and then incubated overnight at 4°C with K48-

linkage specific polyubiquitin antibody. The membrane was washed thrice for 5 minutes with PBS-T (PBS-0.05% Tween-20) and then incubated with IRDye 800–labeled secondary antibody (1:12,000) from Molecular Probes (Eugene, OR) for 30 minutes. Membrane visualization was done using the LI-COR Odyssey IR Imaging System (LI-COR Biosciences, Lincoln).

*ELISA assay (Enzyme-Linked-ImmunoSorbent-Assay).* To perform a protein/interaction experiment was also used an Indirect ELISA approach. High binding plates (Ultracruz, Santacruz) were coated with Ubiquitin or Abeta, alternatively. The peptides were diluted to a final concentration of 10  $\mu$ M in carbonate/bicarbonate buffer, pH 9,6, and distributed to the selected wells of the plate for coating reaction (overnight 4°C). The remaining protein-binding sites in the well were blocked by covering the surface with 100 / 200  $\mu$ L blocking buffer (PBS-T) for 2hrs. The second protein/peptide solution (20  $\mu$ M in PBS 100 uL pH 7,4) was then added to the selected wells. The sealed plate was incubated for 2 hrs at room temperature. After washing and a further step of unspecific site blocking, 100  $\mu$ L of the appropriately diluted primary monoclonal antibodies, anti A $\beta$  (Mouse anti-A $\beta$  [1-16], Invitrogen) or anti Ubiquitin (Mouse anti-Ubiquitin VU-1, Life sensor) alternatively, were added to each well, and sealed plate incubated overnight at 4°C. Each step was interrupted by washing steps with PBS/Tween. Incubation for 1 hour at 37°C with the appropriately diluted HRPO conjugated secondary anti mouse antibody (Invitrogen) to each well, was followed by detection. The addition of TMB substrate solution (50  $\mu$ L, 20 minutes) to each well resulted in the development of colored product. After stopping the enzymatic reaction the plate was read at 450 nm by a plate reader (Multiskan Ascent). Neuroblastoma SHSY5Y cell cultures were grown until 80% confluency and differentiated by classic retinoic acid treatment before mechanical harvesting and homogeneization in PBS. A 30 min 12000 rpm centrifugation preceded the recovery of supernatant cytoplasmic material used in the ELISA experiments.

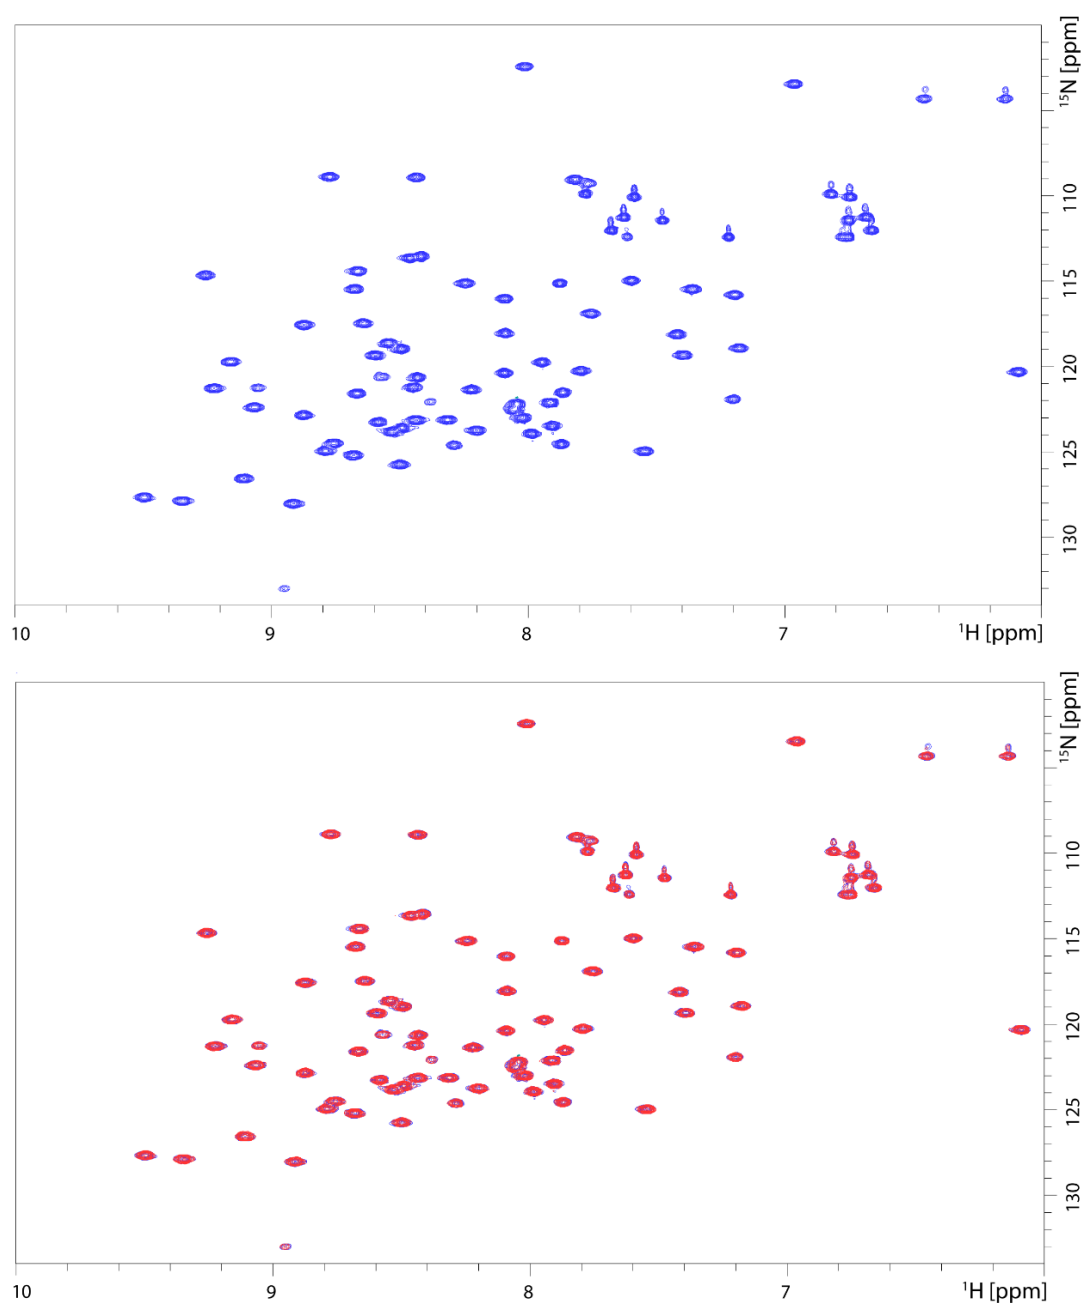

**Figure S1.** Upper panel:  $^1\text{H}$ - $^{15}\text{N}$  HSQC spectrum of  $^{15}\text{N}$ - $^{13}\text{C}$ -labeled Ubiquitin. Lower panel: superimposition of the  $^1\text{H}$ - $^{15}\text{N}$  HSQC spectra of  $^{15}\text{N}$ - $^{13}\text{C}$ -labeled Ubiquitin in absence (blue) and in presence (red) of substoichiometric amount of unlabeled A $\beta$ 40 (2:1 Ubiquitin:A $\beta$ 40 ratio). All the spectra were acquired as reported in Materials and Methods section.



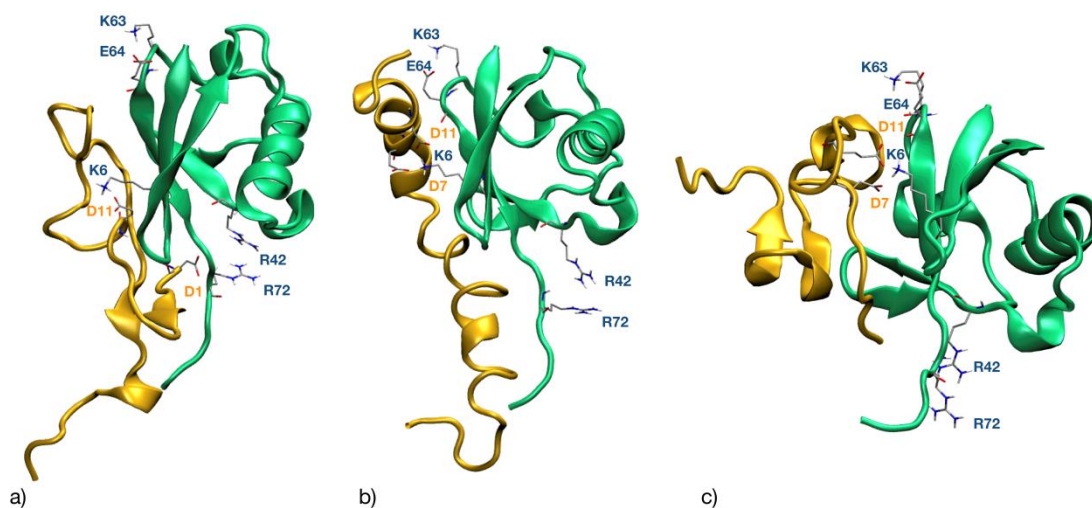

**Figure S2.** The three lowest energy binding modes for the Aβ42/Ub complex. Aβ42 sections are shown by orange ribbons, Ub sections are shown by green ribbons. The residues of Ub interacting with Aβ42 are shown by solid sticks and those involved in salt-bridge interactions are also labeled. The internal energies of the Aβ42/Ub complex in the three binding poses a)-c) are -4195 kcal/mol, -4140 kcal/mol, -4178 kcal/mol.

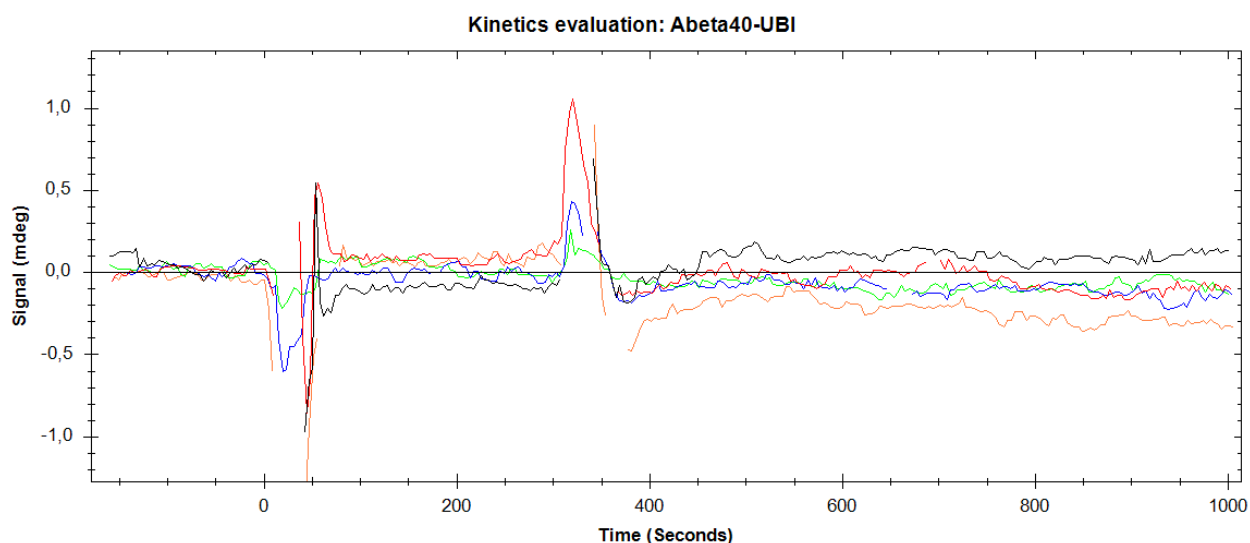

**Figure S3.** Residual values between the fitted curves and the experimental ones of the interaction between immobilized A $\beta$ 40 and ubiquitin at increasing concentration: 43  $\mu$ M (green line)- 86  $\mu$ M (blue line)- 171  $\mu$ M (red line)- 343  $\mu$ M (black line)- 755  $\mu$ M (orange line).

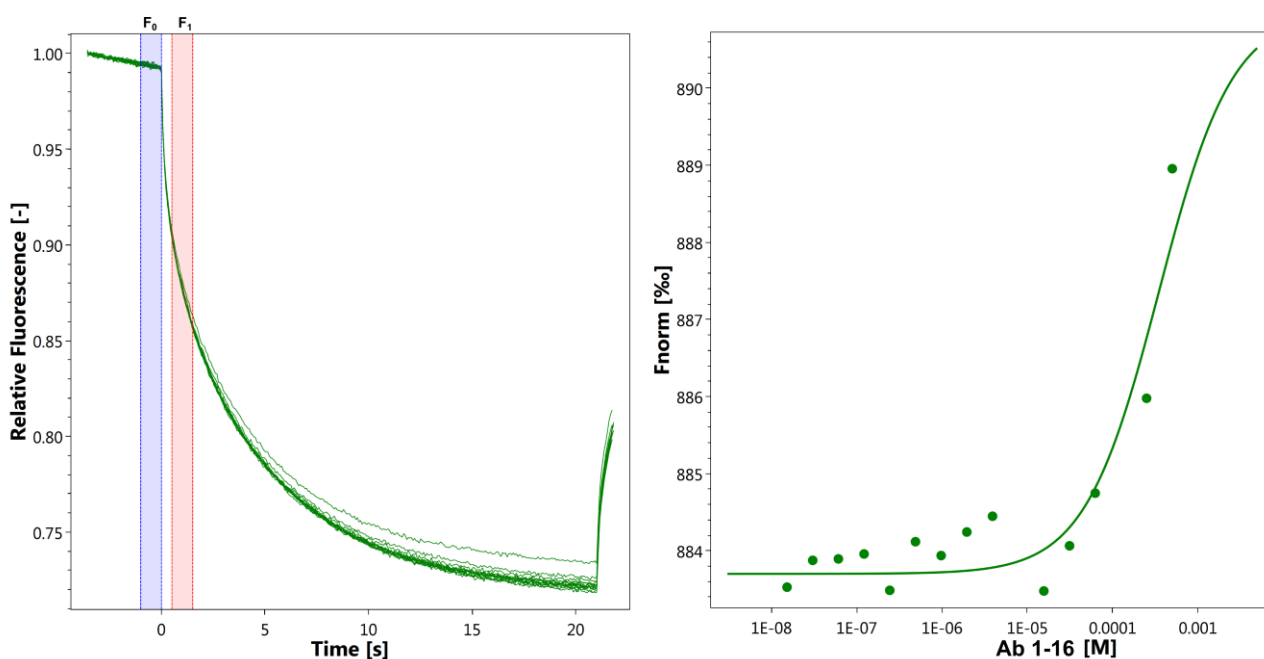

**Figure S4.** MST traces (left) of titrations of A $\beta$ <sub>1-16</sub> against Ubiquitin; F0 and F1 correspond to the fluorescence of unbound state and bound state respectively. Plot of normalized fluorescence (right) obtained from Ubiquitin binding experiment versus A $\beta$ <sub>1-16</sub> at different concentrations (from 1 mM to 20 nM).

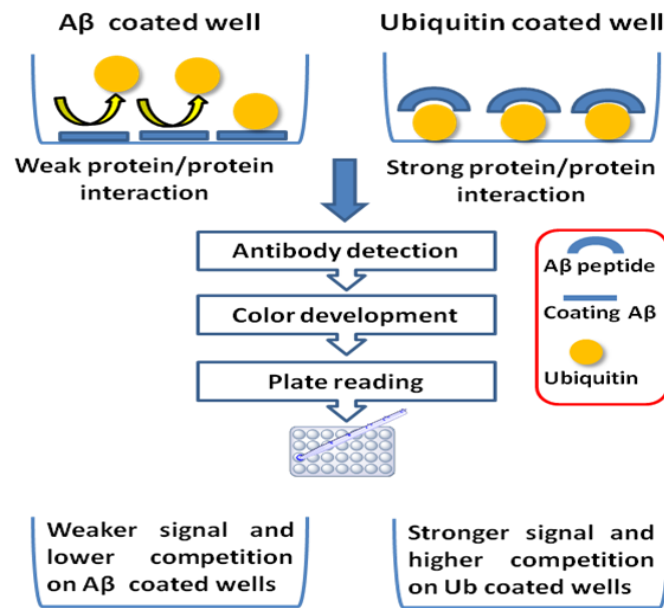

A

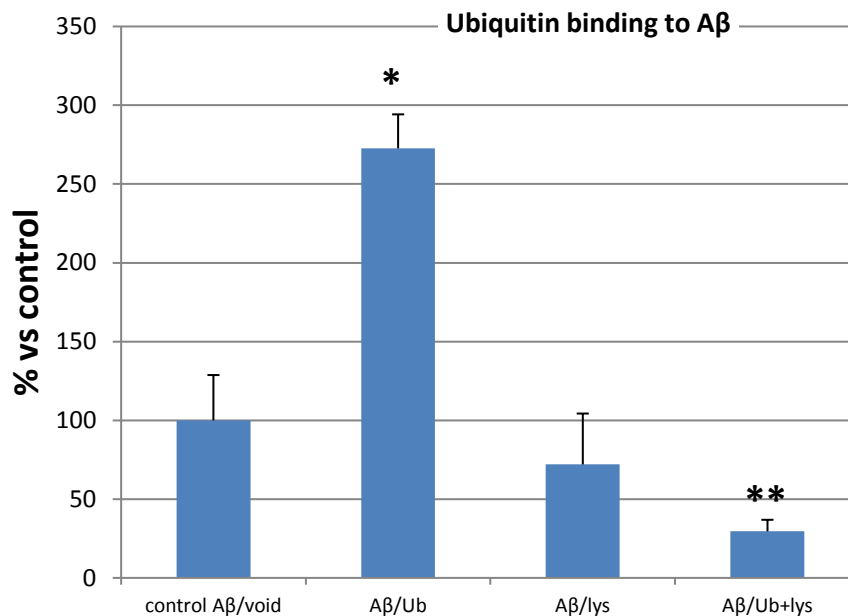

B

**Figure S5.** Flowchart of the two different ELISA assays. The Aβ peptides covalently linked on the surface in the microwells or in solution are shown as blue bars or semicircles, respectively. The graph schematically explains the two situations occurred in the ELISA experiments (panel A). Inhibition ELISA histograms for different Ub solutions (control Aβ/void: buffer; Aβ/Ub: 10 μM Ub in buffer solution; Aβ/Lys: whole cell lysates; Aβ/Ub+Lys: 10 μM Ub in cell lysate) added to Aβ-coated microwells (panel B). Significant differences from control values were indicated by ( $p < 0.05$ ) \* (vs. control) \*\* (vs. lysate competition) (one-way ANOVA with Tukey's post hoc test). Normalized data are reported as percentages considering 100% the signal referring to the control Aβ/void.

### *Effect of A $\beta$ 40 on the proteasome activity*

The inhibitory effect of A $\beta$ 40 on the proteasome activity was evaluated by using A $\beta$ <sub>16-28</sub> as the substrate of proteasome 20S. A $\beta$ 40 is not appreciably degraded by proteasome within 30 min at 37°C (data not shown), whereas A $\beta$ <sub>16-28</sub> drops down to 33% of the starting concentration within the same incubation time (Figure S4, 0:1 sample). A $\beta$ 40 clearly inhibits the proteasome mediated-clearance of A $\beta$ <sub>16-28</sub> in a dose-dependent manner. When the larger [A $\beta$ 40]/[A $\beta$ <sub>16-28</sub>] molar ratio was used (3:1), the A $\beta$ <sub>16-28</sub> is not significantly degraded. This experiment demonstrates the inhibitory effect of A $\beta$ 40 on the proteasome activity.

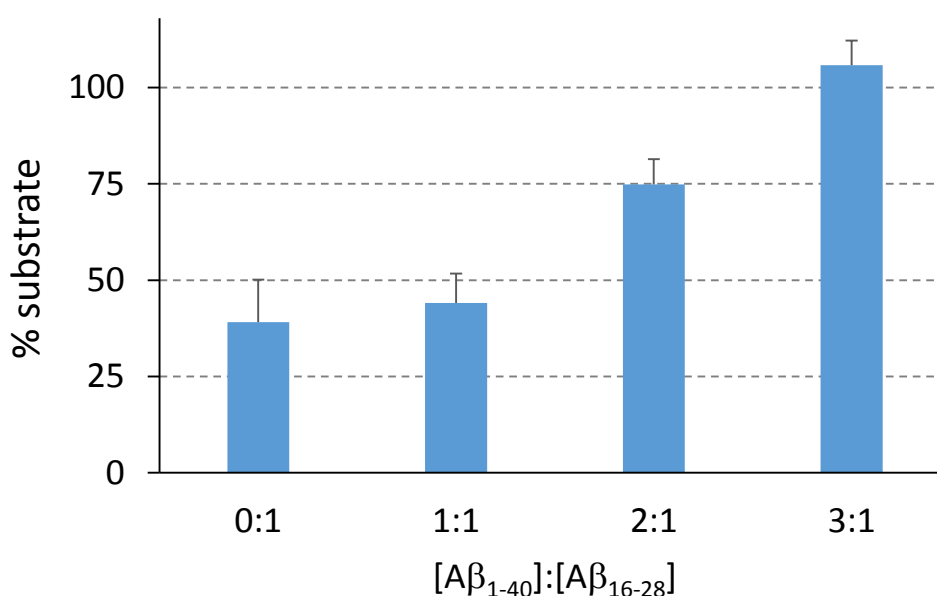

**Figure S6.** Dose dependent effect of the A $\beta$ 40 on the degradation of A $\beta$ <sub>16-28</sub> (2  $\mu$ M) catalysed by yeast proteasome 20S (2 nM) in Tris buffer 1 mM pH 8, at 37 °C for 30 min. Samples were analysed by means of nanoLC-HRMS. The peak area of the XIC related to the main m/z species of the substrate (A $\beta$ <sub>16-28</sub>) was referred to that one obtained before starting the reaction with proteasome. Such values (% substrate) were reported as a function of the A $\beta$ 40 concentration (expressed as a ratio between the A $\beta$ 40 and A $\beta$ <sub>16-28</sub> concentrations).

**Table S1.** Intramolecular unique cross-links in Ub

| 10 $\mu$ M Ub, 10 $\mu$ M A $\beta$ , 20 mM HEPES, pH 8, |          |          |                                 |
|----------------------------------------------------------|----------|----------|---------------------------------|
| Entry                                                    | Site (1) | Site (2) | C $\alpha$ -C $\alpha$ distance |
| 1                                                        | K27      | K48      | 15.9                            |
| 2                                                        | S20      | K63      | 12.5                            |
| 3                                                        | K48      | K63      | 17.9                            |
| 4                                                        | K48      | S20      | 18.3                            |
| 5                                                        | S65      | K48      | 13.9                            |
| 6                                                        | K63      | K29      | 16.7                            |
| 7                                                        | K63      | K33      | 19.6                            |
| 8                                                        | K48      | K27      | 15.9                            |
| 9                                                        | K29      | K33      | 6.2                             |
| 10                                                       | K27      | S20      | 14.0                            |
| 11                                                       | K48      | K29      | 20.2                            |
| 12                                                       | S20      | K29      | 14.2                            |
| 13                                                       | S65      | K27      | 14.0                            |

**Table S2.** Fitted kinetic parameters related to the aggregation of A $\beta$ <sub>1-40</sub> in the presence of Ub, being the Ubi:A $\beta$  ratio ranging from 0:1 (A $\beta$ <sub>1-40</sub> alone) to 3:1. All results are expressed as mean  $\pm$  standard deviation (SD).

| Ubi:A $\beta$ | 0:1            | 0.2:1          | 0.6:1          | 1:1            | 2:1            | 3:1            |
|---------------|----------------|----------------|----------------|----------------|----------------|----------------|
| $F_{max}-F_0$ | 13.0 $\pm$ 0.9 | 11.6 $\pm$ 0.8 | 6.5 $\pm$ 0.5  | 4.2 $\pm$ 0.4  | 2.0 $\pm$ 0.2  | 2.2 $\pm$ 0.3  |
| $t_{lag}$     | 19.2 $\pm$ 0.9 | 23.9 $\pm$ 0.8 | 51.3 $\pm$ 0.9 | 44.4 $\pm$ 0.8 | 50.0 $\pm$ 0.9 | 63.7 $\pm$ 0.8 |

**Table S2.** List of the peptide fragments formed by the action of IDE on A $\beta$ 40 within 60 min at 37°C.

| RT    | m/z (exp.) | z | m/z (theor.) | $\Delta$ (ppm) | A $\beta$ peptide sequence                                          |
|-------|------------|---|--------------|----------------|---------------------------------------------------------------------|
| 13.18 | 849.8667   | 2 | 849.8669     | -0.3           | <sup>1</sup> DAEFRHDSGYEVHH <sup>14</sup>                           |
| 16.12 | 772.0374   | 3 | 772.0387     | -1.8           | <sup>1</sup> DAEFRHDSGYEVHHQKLVF <sup>19</sup>                      |
| 16.75 | 674.3915   | 1 | 674.3911     | 0.6            | <sup>34</sup> LMVGGVV <sup>40</sup>                                 |
| 17.35 | 791.4163   | 2 | 791.4178     | -1.9           | <sup>15</sup> QKLVFFAEDVGSNK <sup>28</sup>                          |
| 17.73 | 821.0607   | 3 | 821.0615     | -1.0           | <sup>1</sup> DAEFRHDSGYEVHHQKLVFF <sup>20</sup>                     |
| 20.36 | 943.5054   | 2 | 943.5068     | -1.4           | <sup>21</sup> AEDVGSNKGAIIGLMVGGVV <sup>40</sup>                    |
| 20.94 | 1017.0392  | 2 | 1017.0410    | -1.8           | <sup>20</sup> FAEDVGSNKGAIIGLMVGGVV <sup>40</sup>                   |
| 21.11 | 1082.7954  | 4 | 1082.7949    | 0.4            | <sup>1</sup> DAEFRHDSGYEVHHQKLVFFAEDVGSNKGAIIGLMVGGVV <sup>40</sup> |
| 21.72 | 929.1727   | 3 | 929.1744     | -1.8           | <sup>14</sup> HQKLVFFAEDVGSNKGAIIGLMVGGVV <sup>40</sup>             |
| 22.26 | 883.4869   | 3 | 883.4881     | -1.3           | <sup>15</sup> QKLVFFAEDVGSNKGAIIGLMVGGVV <sup>40</sup>              |

**Table S4** - Kinetic parameters obtained from the fitting of the SPR curves reported in **Error! Reference source not found.** Data were calculated using the “OneToOne” fitting model.

| [Ub] ( $\mu\text{M}$ ) | Bmax ([Signal (mdeg)]) | ka (1/(M*s)) | kd (1/s) | KD ( $\mu\text{M}$ ) | Chi2 ([Signal (mdeg)] <sup>2</sup> ) |
|------------------------|------------------------|--------------|----------|----------------------|--------------------------------------|
| 43                     | 3                      | 5,33E+01     | 1,90E-02 | 3,56E-04             | 0                                    |
| 86                     | 3                      | 5,33E+01     | 1,90E-02 | 3,56E-04             | 0                                    |
| 171                    | 3                      | 5,33E+01     | 1,90E-02 | 3,56E-04             | 0                                    |
| 343                    | 3                      | 5,33E+01     | 1,90E-02 | 3,56E-04             | 0                                    |
| 755                    | 3                      | 5,33E+01     | 1,90E-02 | 3,56E-04             | 0                                    |

## References

- 1 V. Oliveri, F. Bellia and G. Vecchio, *ChemPlusChem*, **80**, 762–770.
- 2 M. Götze, J. Pettelkau, R. Fritzsche, C. H. Ihling, M. Schäfer and A. Sinz, *J. Am. Soc. Mass Spectrom.*, 2015, **26**, 83–97.
- 3 M. Palmieri, L. Russo, G. Malgieri, S. Esposito, I. Baglivo, A. Rivellino, B. Farina, I. de Paola, L. Zaccaro, D. Milardi, C. Isernia, P. V. Pedone and R. Fattorusso, *Journal of Inorganic Biochemistry*, 2014, **131**, 30–36.
- 4 B. Hess, C. Kutzner, D. van der Spoel and E. Lindahl, *J Chem Theory Comput*, 2008, **4**, 435–447.
- 5 V. Hornak, R. Abel, A. Okur, B. Strockbine, A. Roitberg and C. Simmerling, *Proteins*, 2006, **65**, 712–725.
- 6 W. L. Jorgensen, J. Chandrasekhar, J. D. Madura, R. W. Impey and M. L. Klein, *The Journal of Chemical Physics*, 1983, **79**, 926–935.
- 7 U. Essmann, L. Perera, M. L. Berkowitz, T. Darden, H. Lee and L. G. Pedersen, *The Journal of Chemical Physics*, 1995, **103**, 8577–8593.
- 8 S. Miyamoto and P. A. Kollman, *Journal of Computational Chemistry*, **13**, 952–962.
- 9 B. Hess, *J. Chem. Theory Comput.*, 2008, **4**, 116–122.
- 10 G. Bussi, D. Donadio and M. Parrinello, *The Journal of Chemical Physics*, 2007, **126**, 014101.
- 11 E. Rosta, N.-V. Buchete and G. Hummer, *J. Chem. Theory Comput.*, 2009, **5**, 1393–1399.
- 12 X. Daura, K. Gademann, B. Jaun, D. Seebach, W. F. van Gunsteren and A. E. Mark, *Angewandte Chemie International Edition*, **38**, 236–240.
- 13 G. Pandini, C. Satriano, A. Pietropaolo, F. Gianì, A. Travaglia, D. La Mendola, V. G. Nicoletti and E. Rizzarelli, *Front. Neurosci.*, , DOI:10.3389/fnins.2016.00569.
- 14 A. Travaglia, A. Pietropaolo, R. Di Martino, V. G. Nicoletti, D. La Mendola, P. Calissano and E. Rizzarelli, *ACS Chem. Neurosci.*, 2015, **6**, 1379–1392.
- 15 A. Travaglia, D. La Mendola, A. Magrì, A. Pietropaolo, V. G. Nicoletti, G. Grasso, G. Malgieri, R. Fattorusso, C. Isernia and E. Rizzarelli, *Inorg. Chem.*, 2013, **52**, 11075–11083.
- 16 I. Naletova, V. G. Nicoletti, D. Milardi, A. Pietropaolo and G. Grasso, *Metallomics*, 2016, **8**, 750–761.
- 17 G. Grasso, A. Magrì, F. Bellia, A. Pietropaolo, D. La Mendola and E. Rizzarelli, *Journal of Inorganic Biochemistry*, 2014, **130**, 92–102.
- 18 G. Grasso, V. Lanza, G. Malgieri, R. Fattorusso, A. Pietropaolo, E. Rizzarelli and D. Milardi, *Chemical Communications*, 2015, **51**, 15724–15727.
- 19 S. J. de Vries, M. van Dijk and A. M. J. J. Bonvin, *Nature Protocols*, 2010, **5**, 883–897.
- 20 G. Grasso, P. Mielczarek, M. Niedziolka and J. Silberring, *International Journal of Molecular Sciences*, 2014, **15**, 16787–16799.
- 21 G. Smaldone, L. Pirone, A. Capolupo, L. Vitagliano, M. C. Monti, S. Di Gaetano and E. Pedone, *International journal of biological macromolecules*, 2018, **115**, 469–475.
